# Supplementary material for: Enzyme Efficiency but Not Thermostability Drives Cefotaxime Resistance Evolution in TEM-1 β-Lactamase
Source: PubMed Central journal article supplement — Mol Biol Evol. 2017 Jan 12;34(5):1040–54. doi: 10.1093/molbev/msx053 (PMC5400381; doi:10.1093/molbev/msx053), 2017-01-12
Supplement: msx053_Supp.pdf [file msx053_Supp.pdf]

Supplementary Tables

Table S1 – Density of sign epistasis and mutational additivity in published datasets<sup>a</sup>

| System                                                     | Assay                                     | Density of sign epistasis <sup>b</sup> | $R^2$ for mutational additivity <sup>c</sup> | Data source                                 |
|------------------------------------------------------------|-------------------------------------------|----------------------------------------|----------------------------------------------|---------------------------------------------|
| <b>Avian lysozyme mutants</b>                              | <b>Melting temperature</b>                | <b>0/12</b>                            | <b>0.99</b>                                  | <b>(Malcolm et al. 1990)</b>                |
| <b><i>E. coli</i> dihydrofolate reductase mutants</b>      | <b><i>in vitro</i> enzymatic activity</b> | <b>0/12</b>                            | <b>0.95</b>                                  | <b>(Aita and Husimi 1996)</b>               |
| <i>A. niger</i> visible mutants                            | Growth rate                               | 17/80                                  | 0.71                                         | (de Visser et al. 1997, Franke et al. 2011) |
| <i>D. melanogaster</i> visible mutants                     | Fecundity and survival                    | 18/80                                  | 0.61                                         | (Whitlock and Bourguet 2000)                |
| “                                                          | Male mating success                       | 21/80                                  | 0.48                                         | “                                           |
| <i>E. coli</i> isopropyl malate dehydrogenase mutants      | Growth rate                               | 372/2304                               | 0.50                                         | (Lunzer et al. 2005)                        |
| <b><i>E. coli</i> <math>\beta</math>-lactamase mutants</b> | <b>MIC against cefotaxime at 35° C</b>    | <b>21/80</b>                           | <b>0.92</b>                                  | <b>(Weinreich et al. 2006)</b>              |
| “                                                          | MIC against piperacillin with inhibitor   | 15/80                                  | 0.94                                         | (Tan et al. 2011)                           |
| “                                                          | MIC against cefotaxime at 25° C           | 18/80                                  | 0.97                                         | Knies et al, in prep.                       |
| “                                                          | $k_{cat}/K_M$                             | 11/32                                  | 0.94                                         | This study                                  |

|                                                                                           |                                                              |               |             |                            |
|-------------------------------------------------------------------------------------------|--------------------------------------------------------------|---------------|-------------|----------------------------|
| “                                                                                         | $T_m$                                                        | 2/32          | 0.99        | “                          |
| Mammalian glucocorticoid receptor mutants                                                 | Cortisol binding                                             | 11/32         | 0.63        | (Bridgham et al. 2007)     |
| Solinaceae sesquiterpene mutants                                                          | 5-EA synthesis                                               | 69/192        | 0.27        | (O'Maille et al. 2008)     |
| <i>P. falciparum</i> dihydrofolate reductase mutants                                      | IC <sub>50</sub> against pyrimethamine in <i>E. coli</i>     | 9/32          | 0.57        | (Lozovsky et al. 2009)     |
| “                                                                                         | <b>MIC against pyrimethamine in <i>S. cerevisiae</i></b>     | <b>2/12</b>   | <b>0.90</b> | <b>(Brown et al. 2010)</b> |
| “                                                                                         | IC <sub>50</sub> against cycloguanil in <i>S. cerevisiae</i> | 4/12          | 0.86        | (Costanzo et al. 2011)     |
| <b><i>S. cerevisiae</i> visible mutations</b>                                             | <b>Haploid growth rate</b>                                   | <b>70/192</b> | <b>0.81</b> | <b>(Hall et al. 2010)</b>  |
| “                                                                                         | Diploid growth rate                                          | 58/192        | 0.80        | “                          |
| HIV glycoprotein mutants                                                                  | <i>in vitro</i> infectivity                                  | 22/80         | 0.62        | (da Silva et al. 2010)     |
| <b><i>Metholobacterium extorquens</i> beneficial mutations in novel metabolic pathway</b> | <b>Growth rate</b>                                           | <b>0/32</b>   | <b>0.99</b> | <b>(Chou et al. 2011)</b>  |
| <b><i>E. coli</i> visible mutations</b>                                                   | <b>Growth rate</b>                                           | <b>7/80</b>   | <b>0.94</b> | <b>(Khan et al. 2011)</b>  |

<sup>a</sup> Independent datasets with  $R^2 > 0.80$  shown in bold.

<sup>b</sup> See methods.

<sup>c</sup> In each case, linear regressions were performed on both raw and log-transformed data; the larger  $R^2$  value is reported here.
